# Supplementary material for: A Comprehensive Multimorbidity Disease Risk Prediction Framework for Irish Rheumatoid Arthritis Patients
Source: Research Square preprint supplement (doi:10.21203/rs.3.rs-5994342/v1), 2025-03-20
Supplement: Supplementary file 1 [file 52f3749997d965109a351305.docx]

## Construction of Ensemble Stacking Elastic Net (ESEN) Model for Mortality (Survival Analysis)

The next sections show the modelling Ensemble Stacking methods steps:

### Step 1 Base Models

Let the consist of N observations, where:

ϵ is a dimensional feature vector for the observation.

represents the time to the event (or censoring time) for the observation.

is the event where = 1 if the event occurred and if the observation is censored.

1. **Cox Proportional Hazards.** The base of the model remains the Cox proportional hazards model, which is widely used in survival analysis. It models the hazard function as a product of a baseline hazard and a function of the covariates.

|  | (5.1) |
| --- | --- |

Where is the hazard function, is the baseline hazard, represents the input features, and represents the model coefficients.

1. **Random Survival Forest (RSF).** RSF is an ensemble of decision trees that estimates the survival function for each observation by averaging survival estimates from individual trees:

|  | (5.2) |
| --- | --- |

where B is the total number of trees, and is the survival function estimated by the tree.

1. **Deep Survival Learning.** Deep survival learning is a neural network-based extension of the traditional Cox proportional hazards model. Unlike the Cox model, which uses a linear predictor, Deep Surv uses a neural network to model the risk function:

|  |  | (5.3) |
| --- | --- | --- |

Where:

is the hazard *function*,

is the baseline hazard

represents the input features,

is a neural network parametrized by 𝛳 representing the nonlinear risk score.

### Step 2 Stacking Predictions

Let , , represent the predicted risk scores from the three base models for the  observation. We combine these predictions into a matrix ℤ ϵ , where each row represents the predictions for a single observation:

|  | (5.4) |
| --- | --- |

### Step 3 Meta Model (Elastic Net Cox)

The meta-model is an elastic net-regularized Cox proportional hazards model trained on the stacked predictions . The elastic net penalty combinesand regularization to prevent overfitting:

|  | (5.5) |
| --- | --- |

where:

is the row of the matrix

γ is the vector of coefficients for the meta-model.

and are regularisation parameters for the -norm and -norm, respectively.

### Final Prediction

The final predicted risk score for the observation is given by:

|  | (5.6) |
| --- | --- |

where is the vector of coefficients learned by the meta-model.
