# Supplementary material for: A Comprehensive Multimorbidity Disease Risk Prediction Framework for Irish Rheumatoid Arthritis Patients
Source: Research Square preprint supplement (doi:10.21203/rs.3.rs-5994342/v1), 2025-03-20
Supplement: Supplementary file 2 [file 536a106b363ff600317e9193.docx]

## Construction of Multi Tasks XGBoost Model (MT-XGBoost)

A Multi Tasks Model is designed to predict multiple outcomes (tasks) simultaneously. Instead of training separate models for each task, a multi-task model uses the same data and model to improve efficiency and generalization by capturing common patterns among tasks. Each task can still have its unique outputs and objectives, allowing the model to learn both common and task-specific features. Here is the MT-XGBoost model structure: The input feature matrix is common between all tasks:

Number of samples

Number of Features

For each task (where ):

The target variable is associated with the task.

1. **Individual Objective Functions.** For each task , XGBoost minimize its task-specific object function. The objective consists of two components: the loss function and the regularization term.

|  | (1) |
| --- | --- |

Where:

is Loss function for task , measuring the difference between true labels

and predicted outputs . For binary classification =

is a Regularization term to prevent overfitting.

|  | (2) |
| --- | --- |

: Number of trees.

: leaf weights.

: Regularization parameter for the complexity of the tree.

L2 regularization parameter for leaf weights

: Model parameters (e.g., tree structure and weights) for task

1. **Predictions.** For task , predictions are made by summing contributions from all trees in the ensemble:

|  | (3) |
| --- | --- |

: contribution of the tree for input

Activation function (sigmoid for binary classification)

Multi-Task Learning Framework

The total objective across all tasks combines the objectives of individual tasks:

|  | (4) |
| --- | --- |

Where:

Weight for task .

So, during each boosting iteration, XGBoost uses the gradient () and Hessian () of the loss function for each task:

|  | (5) |
| --- | --- |

values are used to construct decision trees iteratively for each task.
